## INDEX OF AUTHORS AND SUBJECTS • VOLUME 40

**Index of Issues:** January, pp. 1-110; February, pp. 111-210; March, pp. 211-318; April, pp. 319-420; May, pp. 421-522; June, pp. 523-638.

Author entries for original articles include the titles of the articles and co-authors under the first author; reference is made from the joint authors.

Subject entries for all material in the JOURNAL appear in this index. The name of the author of an original article, in brackets, follows the subject entry. Entries from the JOURNAL departments are identified by the departments in which the subject matter appears, e.g., Editorial, Clinical Workshop.

**ABRAMSON, D.**, see BRACKBILL, Y., jt. auth.

**Acid-aspiration pneumonitis**, see under Complications, aspiration; Lung, aspiration

**Acid-base equilibrium acidosis**

respiratory, awake and during diethyl ether anesthesia (clinical workshop) [Gregory & others], 301

**alkalosis**

acute, and hyperphosphatemia in dogs, oxygen transport during [Farber & others], 525

metabolic, in pregnant ewe, effects on fetal acid-base status [Ralston & others], 348

oxymorphone and, interaction in man causing respiratory depression [Hudson & others], 543

respiratory, in pregnant ewe, effects on fetal oxygenation and acid-base status [Levinson & others], 340

**measurement**

during anesthesia, peripheral venous blood used for (clinical workshop) [France & others], 311

base excess using a programmable calculator (clinical workshop) [Gershwin & others], 89

**Acidosis**, see under Acid-base equilibrium

**Acupuncture**

difficulties of investigation

(correspondence) [Millman], 611

(correspondence) [Stoelting & others], 613

(correspondence) [Szele], 612

People's Republic of China, anesthesiology practice in (special article) [Bonica], 175

**Adenosine monophosphate**, see Metabolism, adenosine monophosphate

**Adrenal**, see under Hormones, adrenocorticotropic; Hormones, aldosterone; Hormones, corticosteroid; Sympathetic nervous system; Surgery, adrenalectomy; Surgery, pheochromocytoma

**Age**

ketamine, comparative evaluation in children and adults [Sussman], 459

ketamine requirement in relation to in pediatric patients (clinical workshop) [Lockhart & Nelson], 507

**Air embolism**, see under Embolism

**Airway**, non-endotracheal, for surgery of head in outpatients (clinical workshop) [Welsh], 298

**Alkalosis**, see under Acid-base equilibrium

**ALLEN, G. W.**, see CHENEY, D. H., jt. auth.

**Allergy**, trifluoroacetate, metabolite of halothane and fluroxene, cutaneous delayed-type hypersensitivity [Mathieu & others], 385

**ALPER, M. H.**, see SCANLON, J. W., jt. auth.

**Alpha-adrenergic receptors**, see under Sympathetic nervous system

**AMARANATH, L.**, and **ANDERSEN, N. B.**, The effects of anesthetics on permeability to water of the inactivated toad bladder, 168

—, see ANDERSEN, N. B., jt. auth.

**Amphetamine**, see Analeptics, dextroamphetamine

**Analeptics**, flurothyl, mitochondrial respiration depressed by [Nahrwold & others], 566

**Analgesics**

narcotic

mepheridine, neonatal effects assessed [Brackbill & others], 116

morphine, effect on isolated human atrial muscle [Krishna & Paradise], 147

morphine, pancuronium and, hemodynamic interaction between (clinical workshop) [Grossman & Jacobi], 299

oxymorphone, and alkalosis, interaction in man causing respiratory depression [Hudson & others], 543

**Anatomy**, vena cava, superior, cannulation (clinical workshop) [Tsueda & others], 304

**ANDERSEN, N. B.**, and **AMARANATH, L.**, The sodium-pumping mechanism of the toad bladder (correspondence), 315

— and **CASCORBI, H. F.**, Effects of methoxyflurane and two metabolites on sodium transport in the toad bladder, 371

—, see AMARANATH, L., jt. auth.

**Anesthesia**

obstetric

aspiration during vaginal delivery (correspondence) [Roberts & Shirley], 317

mepheridine effects on neonates assessed [Brackbill & others], 116

neonatal effects, identifying (editorial views) [Desmond], 111

oxytocin effects on blood pressure (clinical workshop) [Weis & Peak], 189

peridural anesthesia effects on neonates assessed [Scanlon & others], 121

- peridural, extradural pressures in parturient patient (clinical workshop) [Galbert & Marx], 499
- uterine blood flow response to maternal hyper-ventilation in pregnant ewe [Levinson & others], 340
- uterine blood flow responses to sympathomimetic agents in pregnant ewe [Ralston & others], 354
- pediatric**
- gastric distention during bag-mask ventilation prevented by cricoid pressure (clinical workshop) [Salem & others], 96
- hydranencephalic infant, ketamine anesthesia in (clinical workshop) [Morse & Smith], 407
- ketamine requirement relationship to age (clinical workshop) [Lockhart & Nelson], 507
- psychologic preparation for anesthesia using motion pictures (special article) [Vernon & Bailey], 68
- tracheal connectors (correspondence) [Downes], 206
- ventilators, Amsterdam infant ventilator and Ayre T-piece in mechanical ventilation [Urban & Weitzner], 423
- theories of, see Theories
- veterinary**
- spinal anesthesia in dog, new techniques (laboratory note) [Redderson & others], 187
- whales, body size effect on anesthetic uptake [Wahrenbrock & others], 19
- The Anesthesiologist's Bookshelf (book reviews), 106, 520, 615
- Anesthesiologists**
- in intensive care
- (correspondence) [Little], 614
- (correspondence) [Winters], 613
- Anesthesiology, People's Republic of China (special article) [Bonical], 175
- Anesthetic techniques**
- bronchoscopy, inflation-catheter technique for ventilation during (clinical workshop) [Gillick], 503
- inhalation, minimal-flow nitrous oxide (clinical workshop) [Virtue], 196
- intubation, training aid for (clinical workshop) [Berkebile & others], 411
- laryngoscopy**
- direct, training aid for (clinical workshop) [Berkebile & others], 411
- endotracheal intubation and with pancuronium, cardiovascular responses to (clinical workshop) [Vaughan & others], 75
- peridural**
- obstetric, effects on neonates assessed [Scanlon & others], 121
- obstetric, extradural pressures in parturient patient (clinical workshop) [Galbert & Marx], 499
- regional**, ulnar nerve block, modified bilateral, in evaluation of etidocaine [Poppers & others], 13
- spinal anesthesia in dog** (laboratory note) [Redderson & others], 187
- topical spray effects on laryngeal closure reflex** compared with those of intravenous Innovar (clinical workshop) [Kopriva & others], 596
- Anesthetics**
- gases**
- cyclopropane effects on contractility and cAMP system in rat aorta [Sprague & Ngai], 336
- cyclopropane, effects on sympathetic nervous system and neural regulation of circulation in the cat [Fukunaga & Epstein], 323
- cyclopropane, history (editorial views) [Greene], 320
- cyclopropane, shock, hemorrhagic, effect on response to [Theye & others], 32
- cyclopropane, sympathoadrenal and hemodynamic effects in dogs [Perry & others], 465
- nitrous oxide, lamina-specific suppression and acceleration of dorsal-horn unit activity by [Taub & others], 24
- nitrous oxide, minimal-flow anesthesia technique (clinical workshop) [Virtue], 196
- nitrous oxide, second-gas effect on oxygen, extent and duration (clinical workshop) [Bojrab & Stoelting], 201
- nitrous oxide, trace, effects on perceptual, cognitive, and motor skills [Bruce & others], 453
- trace nitrous oxide, effects on perceptual, cognitive, and motor skills [Bruce & others], 453
- intravenous**
- Innovar, topical spray and, comparison of effects on laryngeal closure reflex (clinical workshop) [Kopriva & others], 596
- ketamine anesthesia in hydranencephalic infant (clinical workshop) [Morse & Smith], 407
- ketamine, comparative evaluation in children and adults [Sussman], 459
- ketamine effects on evoked electrospinogram and electromyogram in man [Kano & Shim-oji], 241
- ketamine, effects on spiral-cut strips of rabbit aorta [Yamanaka & Dowdy], 222
- ketamine, requirement, relationship to age in pediatric patients (clinical workshop) [Lockhart & Nelson], 507
- ketamine, stress ulcers induced in rat by [Cheney & others], 531
- neuroleptics, effects on evoked electrospinogram and electromyogram in man [Kano & Shimoji], 241
- neuroleptics, potencies of fentanyl and morphine (correspondence) [Keeri-Szanto], 518
- neuroleptics, potencies of fentanyl and morphine (correspondence) [Romagnoli], 519
- thiamylal effects on electrical activities of human central and peripheral nervous systems [Shimoi & others], 234
- local**
- bupivacaine with epinephrine, instability of steam-autoclaved (clinical workshop) [DeLeo & others], 297
- Cetacaine, intravenous Innovar and, compari-

- son of effects on, laryngeal closure reflex (clinical workshop) [Kopriva & others], 596
- etidocaine, evaluated with modified bilateral ulnar-nerve-block technique [Poppers & others], 13
- lidocaine blocking concentrations for B- and C-nerve fibers [Heavner & de Jong], 228
- lidocaine, effects on canine cerebral metabolism and circulation related to electroencephalogram [Sakabe & others], 433
- lidocaine, phagocytosis and metabolism of human leukocytes inhibited by [Cullen & Haschke], 142
- narcotic**
- morphine, fentanyl and, potencies of (correspondence) [Keeri-Szanto], 518
- morphine, fentanyl and, potencies of (correspondence) [Romagnoli], 519
- potency, see Potency
- volatile**
- chloroform biotransformation, historical note (correspondence) [Caşcorbi], 316
- diethyl ether, cardiovascular effects of carbon dioxide during anesthesia (clinical workshop) [Gregory & others], 301
- diethyl ether effect on cerebral glucose metabolism—the pentose phosphate pathway [Hakim & Moss], 261
- diethyl ether, hepatic microsomal enzyme induction by [Brown & Sagalyn], 152
- enflurane, canine cerebral oxygen consumption during and modification during induced seizures [Michenfelder & Cucchiara], 575
- enflurane effects on contractile performance of isolated papillary muscles from failing hearts [Kemmotsu & others], 252
- enflurane, possible nephrotoxicity from in patient with severe renal disease (clinical workshop) [Loehning & Mazze], 203
- fluroxene, biotransformation in man [Gion & others], 553
- fluroxene effects on contractile performance of isolated papillary muscles from failing hearts [Kemmotsu & others], 252
- fluroxene, experimental immunity to metabolite of, cutaneous delayed-type hypersensitivity [Mathieu & others], 385
- halothane, anesthetic requirement determination in rat [White & others], 52
- halothane, effects on contractility and cAMP system in rat aorta [Sprague & others], 162
- halothane, experimental immunity to metabolite of, cutaneous delayed-type hypersensitivity [Mathieu & others], 385
- halothane, glucose-stimulated insulin secretion in isolated pieces of rat pancreas inhibited by [Gingerich & others], 449
- halothane, renal effects and metabolism in man [Mazze & others], 536
- halothane, shock, hemorrhagic, effect on response to [Theye & others], 32
- halothane, sympathoadrenal and hemodynamic effects in dogs [Perry & others], 465
- halothane, trace, effects on perceptual, cognitive, and motor skills [Bruce & others], 453
- hexafluoroisopropyl methyl ether, mitochondrial respiration depressed by [Nahrwold & others], 566
- isoflurane, anesthetic requirement determination in rat [White & others], 52
- isoflurane, effects on canine cerebral metabolism and blood flow [Cucchiara & others], 571
- isoflurane, effects on contractility and cAMP system in rat aorta [Sprague & others], 162
- isoflurane, metabolism [Hitt & others], 62
- isoflurane, renal effects and metabolism in man [Mazze & others], 536
- isoflurane, shock, hemorrhagic, effect on response to [Theye & others], 32
- isoflurane, sympathoadrenal and hemodynamic effects in dogs [Perry & others], 465
- membrane permeability to water of toad bladder affected by [Amaranath & Andersen], 168
- methoxyflurane, hepatic microsomal enzyme induction by [Brown & Sagalyn], 152
- methoxyflurane and two metabolites, effects on sodium transport in toad bladder [Andersen & Caşcorbi], 371
- trace halothane, effects on perceptual, cognitive, and motor skills [Bruce & others], 453
- Anoxia, see Hypoxia
- Antagonists, narcotic, naloxone, reversal of oxymorphone-induced respiratory depression [Hudson & others], 543
- Antibiotics, Polymyxin B, prolongation of pancuronium-induced neuromuscular blockade by (clinical workshop) [Fogdall & Miller], 84
- Antidiuretic hormone, see under Hormones
- Antiemetics, see under Vomiting
- ANTON, A. H., see REDDERSON, C. L., jt. auth.
- Aorta, see under Arteries
- Apgar score, see under Anesthesia, obstetric
- Apparatus and equipment, see Equipment
- ARBIT, J., see BRUCE, D. L., jt. auth.
- ARENS, J. F., LEJEUNE, F. E., JR., and WEBRE, D. R., Maxillary sinusitis, a complication of nasotracheal intubation (clinical workshop), 415
- Arrhythmia, see under Complications; Heart
- Arteries**
- aortocaval compression and uterine displacement, pregnant women near term (clinical workshop) [Eckstein & Marx], 92
- cannulation of radial artery, complication (clinical workshop) [Johnson], 598
- contractility, cyclopropane effects on in rat aorta [Sprague & Ngai], 336
- contractility, halothane and isoflurane effects on in rat aorta [Sprague & others], 162
- cyclopropane effect on contractility and cAMP system in rat aorta [Sprague & Ngai], 336
- halothane effect on contractility and cAMP system in rat aorta [Sprague & others], 162

- isoflurane effect on contractility and cAMP system in rat aorta [Sprague & others], 162
- ketamine effects on spiral-cut strips of rabbit aorta [Yamanaka & Dowdy], 222
- Aspiration, see under Complications; Lung
- Ataractic agents, benzquinamide, ventilatory effects compared with those of prochlorperazine [Mull & Smith], 581
- Atelectasis, see under Complications, respiratory; Lung
- ATKINSON, K. F., see FARBER, M. O., jt. auth.
- Atrial muscle, see under Heart
- Atrophy, see under Muscle, skeletal
- Autoclaving, see under Sterilization
- Ayre T-piece, see under Equipment, ventilators, pediatric
- BACH, M. J., see BRUCE, D. L., jt. auth.
- BAILEY, W. C., see VERNON, D. T. A., jt. auth.
- BARANYI, F., see COTOL, S., jt. auth.
- BARATZ, R. A., see KUMAR, A., jt. auth.
- Baroreceptors, see Receptors, pressore-
- BARR, G. A., see HITT, B. A., jt. auth.
- , see MAZZE, R. I., jt. auth.
- Base excess, see Acid-base equilibrium
- BEENE, T. K., and EGGERS, G. W. N., JR., Use of the pulse monitor for determining sympathetic block of the arm (clinical workshop), 412
- BELAFSKY, M. A., and KLAWANS, H. L., JR., Prolonged neuromuscular blockade with pancuronium bromide in a young healthy woman (clinical workshop), 295
- BENDIXEN, H. H., see FRANCE, C. J., jt. auth.
- Benzquinamide, see under Ataractic agents; Vomiting, antiemetics
- BERKEBILE, P. E., PFAEFFLE, H. H., SMITH, R. B., and REHKOPF, P., A training aid for direct laryngoscopy and intubation (clinical workshop), 411
- Beta-adrenergic receptors, see under Sympathetic nervous system
- BETZ, W. E., see HICKEY, R. F., jt. auth.
- Bicarbonate, see Acid-base equilibrium
- BIEBUYCK, J. F., see KITZ, R. J., jt. auth.
- Biotransformation
- chloroform, historical note (correspondence) [Cascorbi], 316
- enzyme induction, hepatic microsomal, by inhalation anesthetics [Brown & Sagalyn], 152
- fluroxene
- in man [Gion & others], 553
- metabolite, experimental immunity to, cutaneous delayed-type hypersensitivity [Mathieu & others], 385
- halothane
- metabolite, experimental immunity to, cutaneous delayed-type hypersensitivity [Mathieu & others], 385
- renal effects and metabolism in man [Mazze & others], 536
- isoflurane
- [Hitt & others], 62
- renal effects and metabolism in man [Mazze & others], 536
- methoxyflurane and two metabolites, effects on sodium transport in toad bladder [Andersen & Cascorbi], 371
- pentobarbital [Saubermann & others], 41
- Bleeding, see under Blood, coagulation; Hemorrhage
- BLITT, C. D., and WRIGHT, W. A., An unusual complication of percutaneous internal jugular vein cannulation, puncture of an endotracheal tube cuff (clinical workshop), 306
- Block, neuromuscular, see under Anesthetic techniques, regional
- Blood
- see also Transfusion
- coagulation, epsilon-aminocaproic acid used to reduce bleeding during cardiac bypass in children with congenital heart disease (clinical workshop) [McClure & Izsak], 604
- diphosphoglycerate
- oxygen transport during acute alkalosis and hyperphosphatemia in dogs [Farber & others], 525
- oxygen transport and tissue oxygen requirements, relationship (editorial views) [Laver], 523
- leukocytes, phagocytosis and metabolism inhibited by local anesthetics [Cullen & Haschke], 142
- methemoglobinemia, hereditary, as cause of cyanosis during anesthesia (clinical workshop) [Gabel & Bunn], 516
- pressure
- cyclopropane effects on in the cat [Fukunaga & Epstein], 323
- diastolic, interpretation of measurements in anesthesia [Cullen], 6
- diastolic, response to laryngoscopy and endotracheal intubation with pancuronium during light general anesthesia (clinical workshop) [Vaughan & others], 75
- hypotension, hemorrhagic, anesthetic effects on, response to [Theye & others], 32
- hypotension, supine, in pregnant women near term (clinical workshop) [Eckstein & Marx], 92
- interpretation (editorial views) [Prys-Roberts], 1
- oxytocin effects on during anesthesia (clinical workshop) [Weis & Peak], 189
- pulse pressure, interpretation of measurements in anesthesia [Cullen], 6
- systolic, interpretation of measurements in anesthesia [Cullen], 6
- systolic, response to laryngoscopy and endotracheal intubation with pancuronium during light general anesthesia (clinical workshop) [Vaughan & others], 75
- d-tubocurarine-induced hypotension, dependence on alveolar halothane, dose of d-tubocurarine, and nitrous oxide [Munger & others], 442
- uterine blood flow responses to sympatho-

- mimetic agents in pregnant ewe [Ralston & others], 354
- volume, hypovolemia, inhalation anesthetic effects on response to [Theye & others], 32
- Body position, see under Position
- Body size, see Pharmacokinetics, uptake
- BOJRAB, L., and STOELTING, R. K., Extent and duration of the nitrous oxide second-gas effect on oxygen (clinical workshop), 201
- Bone cement, see under Surgery, orthopedic
- BONICA, J. J., Anesthesiology in The People's Republic of China (special article), 175
- Book reviews, see Anesthesiologist's Bookshelf, the
- BRACKBILL, Y., KANE, J., MANNIELLO, R. L., and ABRAMSON, D., Obstetric meperidine usage and assessment of neonatal status, 116
- Brain
- blood flow
- diethyl ether effect on [Hakim & Moss], 261
- enflurane effects on and modification during induced seizures in dog [Michenfelder & Cucchiara], 575
- isoflurane effects on in dog [Cucchiara & others], 571
- Sixth International Symposium on Cerebral Circulation and Metabolism (report of scientific meeting) [Shapiro & Wollman], 208
- electroencephalogram, lidocaine effects on canine cerebral metabolism and circulation related to [Sakabe & others], 433
- electroencephalography in brain death (medical intelligence) [Harp], 391
- encephalitis and hyperkalemic response to succinylcholine (clinical workshop) [Cowgill & others], 409
- evoked responses, thiamylal effects on in man [Shimoji & others], 234
- metabolism
- diethyl ether effect on pentose phosphate pathway [Hakim & Moss], 261
- enflurane effects on and modification during induced seizures in dog [Michenfelder & Cucchiara], 575
- isoflurane effects on in dog [Cucchiara & others], 571
- lidocaine effects on related to electroencephalogram [Sakabe & others], 433
- Sixth International Symposium on Cerebral Circulation and Metabolism (report of scientific meeting) [Shapiro & Wollman], 208
- pentobarbital distribution [Saubermann & others], 41
- tetanus, cardiovascular effects (medical intelligence) [Tsueda & others], 588
- thalamus, impedance, *d*-tubocurarine effects on [Tarkkanen & others], 247
- thiamylal effects on somatosensory evoked responses in man [Shimoji & others], 234
- vasomotor center, cyclopropane effects on in the cat [Fukunaga & Epstein], 323
- BRITTON, R. M., and NELSON, K. G., Improper oxygenation during bronchofiberscopy (clinical workshop), 87
- Bronchofiberscopy, see Surgery, bronchoscopy
- Bronchoscopy, see under Surgery
- BROWN, B. R., JR., and SAGALYN, A. M., Hepatic microsomal enzyme induction by inhalation anesthetics: mechanism in the rat, 152
- BROWN, R. C., Pulsus alternans as a complication of anesthesia (clinical workshop), 509
- BROWN, W. U., JR., see SCANLON, J. W., jr. auth.
- BRUCE, D. L., BACH, M. J., and ARBIT, J., Trace anesthetic effects on perceptual, cognitive, and motor skills, 453
- BRZICA, S. M., JR., see THEYE, R. A., jr. auth.
- BUNN, H. F., see GABEL, R. A., jr. auth.
- Bupivacaine, see under Anesthetics, local
- Burns, see under Complications
- Calculator, see under Equipment
- CALDERWOOD, H. W., see MODELL, J. H., jr. auth.
- Cannulation, see under Anatomy, vena cava, superior; Complications, arterial; Complications, venipuncture, jugular
- Capacity, functional residual, see Lung, functional residual capacity
- Carbon dioxide
- absorption, placement affects spirometric measurements of gas exchange and pulmonary function (correspondence) [Johnstone & others], 609
- cardiovascular response to awake and during diethyl ether anesthesia (clinical workshop) [Gregory & others], 301
- tension, venous blood, peripheral, used for determination during anesthesia (clinical workshop) [France & others], 311
- Cardiac, see under Heart
- Cardiovascular system, see under Arteries; Heart; Veins
- Caroxin, see under Pharmacology, fluoro-carbons
- CASCORBI, H. F., A historical note on the biotransformation of chloroform (correspondence), 316
- , and GRAVENSTEIN, J. S., Silent death (editorial views), 319
- , see ANDERSEN, N. B., jr. auth.
- Catheter, Swan-Ganz, see under Measurement techniques
- Cerebral, see under Brain
- Cerebrospinal fluid
- pressure
- in parturient patient (clinical workshop) [Galbert & Marx], 499
- d*-tubocurarine effects on [Tarkkanen & others], 247
- Cetacaine, see under Anesthetics, local
- CHADWICK, D. A., Transposition of rotameter tubes (correspondence), 102
- CHALON, J., Estimation of inspiratory-limb humidity in the circle system (correspondence), 100
- CHAPMAN, R. L., JR., see DOWNS, J. B., jr. auth.
- , see MODELL, J. H., jr. auth.
- CHASE, R. E., see GION, H., jr. auth.

- CHENEY, D. H., SLOGOFF, S., and ALLEN, G. W., Ketamine-induced stress ulcers in the rat, 531
- CHENEY, F. W., JR., see SHAPIRO, H. M., *jt. auth.*  
Children, see Anesthesia, pediatric
- Chinese medicine, see Acupuncture; Anesthesiology, People's Republic of China
- Chloroform, see under Anesthetics, volatile
- CLARK, C. R., see NAHRWOLD, M. L., *jt. auth.*
- CLARK, W. C., Pain sensitivity and the report of pain: an introduction to sensory decision theory (special article), 272
- Clotting, see Blood, coagulation
- COBB, M. L., see VAUGHAN, R. W., *jt. auth.*
- COHEN, P. J., see NAHRWOLD, M. L., *jt. auth.*
- Complications
- arrhythmia, pulsus alternans (clinical workshop) [Brown], 509
  - arterial cannulation, radial artery (clinical workshop) [Johnson], 598
  - aspiration
    - acid-aspiration pneumonitis, steroid treatment evaluated [Dudley & Marshall], 136
    - pneumonitis, steroid therapy evaluated [Downs & others], 129
    - sea water, arterial oxygenation after, effects of ventilatory patterns on [Modell & others], 376
    - during vaginal delivery (correspondence) [Roberts & Shirley], 317
  - burns, cutaneous, caused by peripheral-nerve stimulator (clinical workshop) [Lippmann & Fields], 82
  - death
    - anesthetic, which may result from poor choice of less appropriate anesthetic to avoid inhalation anesthetics (editorial views) [Cascorbi & Gravenstein], 319
    - criteria of (medical intelligence) [Harp], 391
    - embolism, air
      - pulmonary edema following (clinical workshop) [Still & others], 194
      - during total hip arthroplasties (clinical workshop) [Ngai & others], 405
    - encephalitis and hyperkalemic response to succinylcholine (clinical workshop) [Cowgill & others], 409
    - gastric distention during bag-mask ventilation of pediatric patients prevented by cricoid pressure (clinical workshop) [Salem & others], 96
    - hydranencephalus, ketamine anesthesia in infant with (clinical workshop) [Morse & Smith], 407
    - hypotension, supine, syndrome in pregnant women near term (clinical workshop) [Eckstein & Marx], 92
    - hypoxia during bronchofiberscopy (clinical workshop) [Britton & Nelson], 87
    - macroglossia with use of sitting position (clinical workshop) [McAllister], 199
    - methemoglobinemia, hereditary, as cause of cyanosis during anesthesia (clinical workshop) [Gabel & Bunn], 516
    - paralysis
      - prolonged, with pancuronium (clinical workshop) [Belafsky & Klawans], 295
      - prolonged, by Polymyxin B after pancuronium-induced neuromuscular blockade (clinical workshop) [Fogdall & Miller], 84
    - periphagus, buccal, anesthetic management of cholecystectomy in a patient with (clinical workshop) [Jeyaram & Torda], 600
    - pin-indexing failures (correspondence) [Hutchinson], 318
    - renal, possible nephrotoxicity from enflurane in patient with severe renal disease (clinical workshop) [Loehning & Mazze], 203
    - sinusitis complicating nasotracheal intubation (clinical workshop) [Arens & others], 415
    - stress ulcers induced by ketamine in rat [Chene & others], 531
    - venipuncture, jugular, puncture of Endotracheal tube cuff (clinical workshop) [Blitt & Wright], 306
  - Contamination, anesthetic, see under Anesthetics, gases, trace; Anesthetics, volatile, trace
  - Contractility
    - arteries, see under Arteries
    - myocardium, see under Heart, myocardial mechanics
  - COTOI, S., and BARANYI, F., The "sign of the tear" in cardiovascular resuscitation (correspondence), 101
  - COUSINS, M. J., Royal Australasian College of Surgeons and Faculty of Anaesthetists (report of scientific meeting), 417
  - , see HITT, B. A., *jt. auth.*
  - , see MAZZE, R. I., *jt. auth.*
  - COVINO, B. G., see POPPERS, P. J., *jt. auth.*
  - COWGILL, D. B., MOSTELLO, L. A., and SHAPIRO, H. M., Encephalitis and a hyperkalemic response to succinylcholine (clinical workshop), 409
  - Cricoid, see under Larynx
  - CUCCHIARA, R. F., THEYE, R. A., and MICHENFELDER, J. D., The effects of isoflurane on canine cerebral metabolism and blood flow, 571
  - , see MICHENFELDER, J. D., *jt. auth.*
  - CULLEN, B. F., and HASCHKE, R. H., Local anesthetic inhibition of phagocytosis and metabolism of human leukocytes, 142
  - , see GREGORY, G. A., *jt. auth.*
  - CULLEN, D. J., Interpretation of blood-pressure measurements in anesthesia, 6
  - CUNNINGHAM, N. L., see PETTY, C., *jt. auth.*
  - Curare, see Neuromuscular relaxants, *d*-tubocurarine
  - Cyanosis, see under Complications; Hypoxia; Ventilation
  - Cyclopropane, see under Anesthetics, gases
  - Deadspace, see under Equipment; Lung; Ventilation
  - Death, anesthetic, see under Complications
  - DE JONG, R. H., see HEAVNER, J. E., *jt. auth.*
  - DELAUNOIS, A. L., see GARDIER, R. W., *jt. auth.*

- DE LEO, B. C., HAMELBERG, W., STAUFFER, G. L., and KRAUSE, S., Instability of steam-augmented bupivacaine with epinephrine (clinical workshop), 297
- DELORMIER, A. A., see LEVINSON, G., jt. auth. —, see RALSTON, D. H., jt. auth. (2)
- DESMOND, M. M., Obstetric medication and infant behavior (editorial views), 111
- Dextroamphetamine, see under Analeptics
- Diethyl ether, see Anesthetics, volatile, diethyl ether
- DILLON, J. B., Malpractice—fifteen years later (correspondence), 99
- DiPADUA, D., see MATHIEU, A., jt. auth.
- Diphosphoglycerate, see under Blood
- DONOVAN, D. J., see JOHNSTON, R. P., jt. auth.
- Dorsal horn, see under Spinal cord
- DOWDY, E. G., see YAMANAKA, I., jt. auth.
- DOWNES, J. J., Pediatric tracheal connectors (correspondence), 206
- DOWNES, J. B., CHAPMAN, R. L., JR., MODELL, J. H., and HOOD, C. I., An evaluation of steroid therapy in aspiration pneumonitis, 129
- , PERKINS, H. M., and SUTTON, W. W., Successful weaning after five years of mechanical ventilation (clinical workshop), 602
- , see MODELL, J. H., jt. auth.
- Dripps, Robert Dunning, see under Obituary
- Droperidol, see Anesthetics, intravenous, neuroleptics
- Drowning, near-, in sea water, ventilatory pattern effects on arterial oxygenation after [Modell & others], 376
- DUDLEY, W. R., and MARSHALL, B. E., Steroid treatment for acid-aspiration pneumonitis, 136
- DUNCALF, D., see TORDA, T. A., jt. auth.
- ECKSTEIN, K.-E., and MARX, G. F., Aortocaval compression and uterine displacement (clinical workshop), 92
- ED<sub>50</sub>, see under Potency, anesthetic
- EDMUNDS, H. N., see HITT, B. A., jt. auth.
- Education  
goldfish model for teaching anesthesia and resuscitation (laboratory note) [Ravin & Tham], 288  
laryngoscopy training, aid for (clinical workshop) [Berkebile & others], 411
- EGER, E. I., II, see FRANCE, C. J., jt. auth.
- , see GREGORY, G. A., jt. auth.
- , see HICKEY, R. F., jt. auth.
- , see WAHRENBRUCK, E. A., jt. auth.
- , see WHITE, P. F., jt. auth.
- EGGERS, G. W. N., JR., see BEENE, T. K., jt. auth.
- Electroencephalogram, see under Brain
- Electromyography, see under Measurement techniques; Muscle, skeletal
- Electrospinogram, see under Measurement techniques; Spinal cord
- ELTRINGHAM, R. J., see KOPRIVA, C. J., jt. auth.
- Embolism, air  
pulmonary edema following (clinical workshop) [Still & others], 194  
during total hip arthroplasties (clinical workshop) [Ngai & others], 405
- Encephalitis, see under Brain; Complications
- Endotracheal anesthesia, see under Anesthetic techniques, endotracheal; Equipment, endotracheal tubes; Intubation
- Enflurane, see under Anesthetics, volatile
- Enzyme induction, see Biotransformation, enzyme induction
- Ephedrine, see under Sympathetic nervous system; sympathomimetic agents
- Epidural anesthesia, see Anesthetic techniques, peridural
- Epinephrine, see under Sympathetic nervous system
- Epsilon-aminocaproic acid, see under Blood, coagulation
- EPSTEIN, R. M., see FUKUNAGA, A. F., jt. auth.
- Equipment  
airway, non-endotracheal, for surgery of head in outpatients (clinical workshop) [Welsh], 298
- Ayre T-piece, see under Equipment, ventilators, pediatric  
calculator, programmable, acid-base equilibrium measured using (clinical workshop) [Gershwin & others], 89
- catheter, Swan-Ganz, errors in sampling pulmonary arterial blood with (clinical workshop) [Shapiro & others], 291
- circle absorber system  
humidification (correspondence) [Chalon], 100  
humidification (correspondence) [Shanks & Sara], 99
- endotracheal connectors, pediatric (correspondence) [Downes], 206
- endotracheal tubes, simple technique of fixation (clinical workshop) [Konchigeri & Homi], 498
- humidifier, disposable, evaluated (clinical workshop) [Weeks], 511
- insulin adsorption by glass infusion bottles, polyvinylchloride infusion containers, and intravenous tubing (clinical workshop) [Petty & Cunningham], 400
- laryngoscope, blade, new use (clinical workshop) [Weeks], 200
- peripheral-nerve stimulator, burns caused by (clinical workshop) [Lippmann & Fields], 82
- pin-indexing failures (correspondence) [Hutchinson], 318
- pulse monitor, for determining sympathetic block of arm (clinical workshop) [Beene & Eggers], 412
- rotameters, transposition of tubes (correspondence) [Chadwick], 102
- transducer and holder for recording thumb adduction (clinical workshop) [Sokoll], 80
- ventilators, pediatric, Amsterdam infant ventilator and Ayre T-piece in mechanical ventilation [Urban & Weitzner], 423
- ERICSON, E. V., see POPPERS, P. J., jt. auth.

- Ether, see Anesthetics, volatile, individual ethers  
 Ethrane, see Anesthetics, volatile, enflurane  
 Ethyl ether, see Anesthetics, volatile, diethyl ether  
 Etidocaine, see under Anesthetics, local  
 Extradural anesthesia, see under Anesthetic techniques, peridural  
 Eyes, tearing during cardiopulmonary resuscitation (correspondence) [Cotoi & Baranyi], 101
- FARBER, M. O., MANFREDI, F., ATKINSON, K. F., and PASSO, T. C., Oxygen transport during acute alkalosis and hyperphosphatemia in dogs, 525
- Fentanyl, see Anesthetics, intravenous, neuroleptics  
 Fetus, see under Anesthesia, obstetric; Placenta; Uterus  
 FIELDS, W. A., see LIPPMANN, M., jt. auth.  
 FINK, B. R., The thyroid cartilage as a spring, 58  
 FISEROVA-BERGEROVA, V., see GION, H., jt. auth.  
 Fluid balance, water clearance, inappropriate response to increased plasma ADH during mechanical ventilation in acute respiratory failure [Kumar & others], 215  
 Fluoride, see under Ions  
 Fluorocarbons, see under Pharmacology  
 Flurothyl, see under Anaesthetics  
 Fluoxetine, see under Anesthetics, volatile  
 FOGDALL, R. P., and MILLER, R. D., Prolongation of a pancuronium-induced neuromuscular blockade by Polymyxin B (clinical workshop), 84  
 Forane, see Anesthetics, volatile, isoflurane  
 FRANCE, C. J., EGER, E. I., II, and BENDIXEN, H. H., The use of peripheral venous blood for pH and carbon dioxide tension determinations during general anesthesia (clinical workshop), 311  
 FUKUNAGA, A. F., and EPSTEIN, R. M., Effects of cyclopropane on the sympathetic nervous system and on neural regulation of circulation in the cat, 323
- GABEL, R. A., and BUNN, H. F., Hereditary methemoglobinemia as a cause of cyanosis during anesthesia (clinical workshop), 516  
 GALBERT, M. W., and MARX, G. F., Extradural pressures in the parturient patient (clinical workshop), 499  
 GALLAGHER, M. L., see SAUBERMANN, A. J., jt. auth.  
 Gallamine, see under Neuromuscular relaxants  
 GANANSIA, M.-F., see GARDIER, R. W., jt. auth.  
 GARDIER, R. W., GANANSIA, M.-F., DELAUNOIS, A. L., and HAMELBERG, W., Enhancement of ganglionic muscarinic activity by gallamine (laboratory note), 494
- Gases  
 anesthetic, see Anesthetics, gases  
 nonanesthetic, helium in nitrous oxide, gas chromatographic analysis (laboratory note) [Hickey & others], 73  
 Gastrointestinal tract  
 stomach  
 distention during bag-mask ventilation of pediatric patients prevented by cricoid pressure (clinical workshop) [Salem & others], 96  
 stress ulcers induced by ketamine in rat [Cheney & others], 531  
 Genetic factors, methemoglobinemia, hereditary, as cause of cyanosis during anesthesia (clinical workshop) [Gabel & Bunn], 516  
 GERSHWIN, R., SMITH, N. T., and SUWA, K., An equation system and programs for obtaining base excess using a programmable calculator (clinical workshop), 89  
 GILLICK, J. S., The inflation-catheter technique for ventilation during bronchoscopy (clinical workshop), 503  
 GINGERICH, R., WRIGHT, P. H., and PARADISE, R. R., Inhibition by halothane of glucose-stimulated insulin secretion in isolated pieces of rat pancreas, 449  
 GION, H., YOSHIMURA, N., HOLADAY, D. A., FISEROVA-BERGEROVA, V., and CHASE, R. E., Biotransformation of fluoxetine in man, 553  
 Glucose, see under Metabolism  
 Goldfish, see Education, goldfish model  
 GONZALES, E. C., see TSUEDA, K., jt. auth.  
 GRAVENSTEIN, J. S., see CASCORBI, H. F., jt. auth.  
 GREENE, N. M., Thoughts on a paleoanesthetic (editorial views), 320  
 —, Words as keys (editorial views), 4  
 GREGORY, G. A., EGER, E. I., II, SMITH, N. T., and CULLEN, B. F., The cardiovascular effects of carbon dioxide in man awake and during diethyl ether anesthesia (clinical workshop), 301  
 GRONERT, G. A., and THEYE, R. A., Effect of succinylcholine on skeletal muscle with immobilization atrophy, 268  
 GROSSMAN, E., and JACOBI, A. M., Hemodynamic interaction between pancuronium and morphine (clinical workshop), 299
- HAIJNY, R. G., see HICKEY, R. F., jt. auth.  
 HAKIM, A. M., and MOSS, G., The effect of ether anesthesia on cerebral glucose metabolism—the pentose phosphate pathway, 261  
 Halothane, see under Anesthetics, volatile  
 HAMELBERG, W., see DELEO, B. C., jt. auth.  
 —, see GARDIER, R. W., jt. auth.  
 HARBER, P. I., see HUDSON, H. E., jt. auth.  
 HARP, J. R., Criteria for the determination of death (medical intelligence), 391  
 —, WYCHE, M. Q., MARSHALL, B. E., and WURZEL, H. A., Some factors determining rate of microaggregate formation in stored blood (clinical workshop), 398  
 HASCHKE, R. H., see CULLEN, B. F., jt. auth.  
 HASELBY, K. A., see STOELTING, R. K., jt. auth.  
 HASHIMOTO, Y., see KEMMOTSU, O., jt. auth.
- Heart  
 arrhythmia, pulsus alternans as complication of anesthesia (clinical workshop) [Brown], 509



- atrial muscle, isolated human, morphine effects on [Krishna & Paradise], 147
- carbon dioxide, response to awake and during diethyl ether anesthesia (clinical workshop) [Gregory & others], 301
- cardiac index, inappropriate response to increased plasma ADH during mechanical ventilation in acute respiratory failure [Kumar & others], 215
- cardiac output, volatile anesthetic and cyclopropane effects on in dogs [Perry & others], 465
- massage, tearing of eyes as criterion for estimation of cerebral circulation during (correspondence) [Cotoi & Baranyi], 101
- myocardial mechanics, fluroxene and enflurane effects on in failing hearts [Kemimoto & others], 252
- rate, responses to laryngoscopy and endotracheal intubation with pancuronium during light general anesthesia (clinical workshop) [Vaughan & others], 75
- stroke volume, correlation with systolic pressure [Cullen], 6
- tetanus, cardiovascular effects (medical intelligence) [Tsueda & others], 588
- d*-tubocurarine-induced hypotension, dependence on alveolar halothane, dose of *d*-tubocurarine, and nitrous oxide [Munger & others], 442
- HEAVNER, J. E., and DE JONG, R. H., Lidocaine blocking concentrations for B- and C-nerve fibers, 228
- HELDY-WHYTE, J., see SAUBERMANN, A. J., jt. auth.
- Helium, see under Gases, nonanesthetic
- Hemorrhage, inhalation anesthetic effects on response to hypotension induced by [Theye & others], 32
- Hepatic, see under Liver
- Hexafluorodiethyl ether, see Analeptics, fluoroethyl
- Hexafluoroisopropyl methyl ether, see under Anesthetics, volatile
- HICKEY, R. F., HAJNY, R. G., BETZ, W. E., and EGER, E. I., II, Gas chromatographic analysis of helium in nitrous oxide (laboratory note), 73
- Histamine contraction of spiral-cut strips of rabbit aorta, ketamine effects on [Yamanaka & Dowdy], 222
- History  
chloroform biotransformation (correspondence) [Cascorbi], 316  
cyclopropane (editorial views) [Greene], 320
- HITT, B. A., MAZZE, R. I., COUSINS, M. J., EDMUNDS, H. N., BARR, C. A., and TRUDELL, J. R., Metabolism of isoflurane in Fischer 344 rats and man, 62
- HOFFERT, M., see TAUB, A., jt. auth.
- HOLADAY, D. A., see GION, H., jt. auth.
- HOMI, J., see KONCHIGERI, H. N., jt. auth.
- HOOD, C. I., see DOWNS, J. B., jt. auth.
- Hormones  
antidiuretic hormone, plasma, increased, inappropriate response to during mechanical ventilation in acute respiratory failure [Kumar & others], 215
- insulin  
adsorption by glass infusion bottles, polyvinylchloride infusion containers, and intravenous tubing (clinical workshop) [Petty & Cunningham], 400  
halothane inhibition of glucose-stimulated secretion in isolated pieces of rat pancreas [Gingerich & others], 449
- prostaglandins  
basic and clinical considerations (review article) [Katz & Katz], 471  
importance of to anesthesiologists (editorial views) [Wollman], 421
- steroid  
acid-aspiration pneumonitis treated with, evaluation [Dudley & Marshall], 136  
aspiration pneumonitis treated with, evaluation [Downs & others], 129
- HUDSON, H. E., HARBER, P. I., and SMITH, T. C., Respiratory depression from alkalosis and opioid interaction in man, 543
- Humidification  
circle absorber system  
(correspondence) [Chalon], 100  
(correspondence) [Shanks & Sara], 99  
disposable humidifier evaluated (clinical workshop) [Weeks], 511
- Humidifier, see under Equipment
- HUTCHINSON, B. R., pin-indexing failures (correspondence), 318
- Hydranencephalus, see under Anesthesia, pediatric
- Hypercapnia, see Acid-base equilibrium, acidosis, respiratory; Carbon dioxide, hypercarbia
- Hypercarbia, see Acid-base equilibrium, acidosis, respiratory; Carbon dioxide, hypercarbia
- Hyperpyrexia, see Hyperthermia
- Hypersensitivity, see Allergy
- Hyperthermia, parotidectomy in patient with family history of (clinical workshop) [Wadhwa & Tantisira], 191
- Hypnotics, barbiturate, pentobarbital uptake, distribution, and anesthetic effect [Saubermann & others], 41
- Hypocapnia, see Acid-base equilibrium, alkalosis, respiratory; Carbon dioxide, hypocarbia
- Hypocarbia, see Acid-base equilibrium, alkalosis, respiratory; Carbon dioxide, hypocarbia
- Hypotension, supine, syndrome, see under Complications
- Hypovolemia, see under Blood volume
- Hypoxia during bronchofiberscopy (clinical workshop) [Britton & Nelson], 87
- Impedance, see under Brain, thalamus
- Index, cardiac, see Heart, cardiac index
- Index views, editorial policy, ANESTHESIOLOGY (editorial views) [Greene], 4
- Induction  
see Anesthetic techniques, induction; Biotransformation, enzyme induction  
anesthesia, rate not altered by ventilation of

- unperfused alveoli if alveolar ventilation and cardiac output are unchanged [Stoelting & Longnecker], 563
- Infants, see under Anesthesia, obstetric; Anesthesia, pediatric
- Infection, tetanus, cardiovascular manifestations (medical intelligence) [Tsueda & others], 588
- Inflation-catheter ventilation, see under Anesthetic techniques, bronchoscopy
- Innovar, see under Anesthetics, intravenous
- Insulin, see under Hormones
- Intensive care, tetanus, cardiovascular manifestations (medical intelligence) [Tsueda & others], 588
- Interactions  
morphine-benzquinamide [Mull & Smith], 581  
morphine-prochlorperazine [Mull & Smith], 581  
neuromuscular relaxants, Polymyxin B prolongation of pancuronium-induced block (clinical workshop) [Fogdall & Miller], 84  
pancuronium-morphine (clinical workshop) [Grossman & Jacob], 299
- International Symposium on Cerebral Circulation and Metabolism, see under Organizations
- International Symposium on Oxygen Transport to Tissue, See under Organizations
- Intubation  
complications, sinusitis (clinical workshop) [Arens & others], 415  
endotracheal, laryngoscopy and, with pancuronium during light general anesthesia, cardiovascular responses to (clinical workshop) [Vaughan & others], 75  
training aid for (clinical workshop) [Berkebile & others], 411
- Ions  
fluoride  
metabolite of methoxyflurane, effect on sodium transport in toad bladder [Andersen & Cascorbi], 371  
metabolites, isoflurane [Hitt & others], 62  
serum and urinary after isoflurane and halothane in man [Mazze & others], 536
- potassium  
succinylcholine effects on flux in normal and atrophic muscle [Gronert & Theye], 268  
succinylcholine-induced hyperkalemia associated with encephalitis (clinical workshop) [Cowgill & others], 409
- sodium  
transport, inappropriate response to increased plasma ADH during mechanical ventilation in acute respiratory failure [Kumar & others], 215  
transport, mechanism in toad bladder (correspondence) [Andersen & Amaranath], 315  
transport, mechanism in toad bladder (correspondence) [Kallus], 315  
transport in toad bladder, anesthetic effects [Amaranath & Andersen], 168  
transport in toad bladder, responses to methoxyflurane and two metabolites [Andersen & Cascorbi], 371
- ISHIKAWA, T., see SAKABE, T., jt. auth.
- Isoflurane, see under Anesthetics, volatile
- Isoproterenol, see under Sympathetic nervous system, sympathomimetic agents
- IZSAK, J., see MCCLURE, P. D., jt. auth.
- JACOBI, A. M., see GROSSMAN, E., jt. auth.
- JEAN-FRANCOIS, J. L., see TSUEDA, K., jt. auth.
- JAYARAM, C., and TORDA, T. A., Anesthetic management of cholecystectomy in a patient with buccal pemphigus (clinical workshop), 600
- JOHANSSON, G., see TARKKANEN, L., jt. auth.
- JOHNSON, R. W., A complication of radial-artery cannulation (clinical workshop), 598
- JOHNSTON, R. P., DONOVAN, D. J., and MAC-DONNELL, K. F., PEEP during assisted ventilation (clinical workshop), 308
- JOHNSTON, R. R., see WHITE, P. F., jt. auth.
- JOHNSTONE, R. E., REIER, C. E., and SMITH, T. C., CO<sub>2</sub> absorber placement affects spirometric measurements of gas exchange and pulmonary function (correspondence), 609
- KAHAN, B., see MATHIEU, A., jt. auth.
- KALLUS, F. T., The sodium-pumping mechanism of the toad bladder (correspondence), 315
- KANE, J., see BRACKBILL, Y., jt. auth.
- KANO, T., and SHIMOJI, K., The effects of ketamine and neuroleptanalgesia on the evoked electrospinogram and electromyogram in man, 241
- , see SHIMOJI, K., jt. auth.
- KATZ, G. J., see KATZ, R. L., jt. auth.
- KATZ, R. L., and KATZ, G. J., Prostaglandins—basic and clinical considerations (review article), 471
- , see POPPERS, P. J., jt. auth.
- KEERI-SZANTO, M., Potencies of fentanyl and morphine (correspondence), 518
- KEMMOTSU, O., HASHIMOTO, Y., and SHIMOSATO, S., The effects of furoxene and enflurane on contractile performance of isolated papillary muscles from failing hearts, 252
- Ketamine, see under Anesthetics, intravenous
- Kidney  
nephrotoxicity  
from enflurane, possible, in patient with severe renal disease (clinical workshop) [Loehning & Mazze], 203  
isoflurane and halothane renal effects and metabolism in man [Mazze & others], 536  
urine, output, inappropriate response to increased plasma ADH during mechanical ventilation in acute respiratory failure [Kumar & others], 215
- KIM, K. C., see STOELTING, R. K., jt. auth.
- KITAHATA, L. M., see TAUB, A., jt. auth.
- KITZ, R. J., and BIEBUYCK, J. F., And yet another crisis: research funding in anesthesiology (editorial views), 211
- KLAWANS, H. L., JR., see BELAFSKY, M. A., jt. auth.

- KLEIN, S. L., Molecular structure of bone cement (correspondence), 206
- KONCHIGERI, H. N., and HOMI, J., A simple technique of endotracheal-tube fixation (clinical workshop), 498
- KOPRIVA, C. J., ELTRINGHAM, R. J., and SIEBERT, P. E., A comparison of the effects of intravenous Innovar and topical spray on the laryngeal closure reflex (clinical workshop), 596
- KRAUSE, S., see DELEO, B. C., *jt. auth.*
- KRISHNA, G., and PARADISE, R. R., Effect of morphine on isolated human atrial muscle, 147
- KUMAR, A., PONTOPPIDAN, H., BARATZ, R. A., and LAVER, M. B., Inappropriate response to increased plasma ADH during mechanical ventilation in acute respiratory failure, 215
- LAITINEN, L., see TARKKANEN, L., *jt. auth.*
- Laminae, see under Spinal cord, dorsal horn
- LARAVUSO, R. B., see WAHRENBRÖCK, E. A., *jt. auth.*
- Laryngoscope, see under Equipment
- Laryngoscopy, see under Anesthetic techniques
- Larynx  
closure reflex, effects of intravenous Innovar and topical spray compared (clinical workshop) [Kopriva & others], 596  
cricoid pressure in prevention of gastric distention during bag-mask ventilation in pediatric patients (clinical workshop) [Salem & others], 96  
function [Fink], 58
- LAVER, M. B., An Arthurian legend: oxygen and the regulation of blood flow (editorial views), 523
- , see KUMAR, A., *jt. auth.*
- LEDERMAN, D. S., see STILL, J. A., JR., *jt. auth.*
- LEJEUNE, F. E., JR., see ARENS, J. F., *jt. auth.*
- Leukocytes, see under Blood
- LEVINSON, G., SHNIDER, S. M., DELORMIER, A. A., and STEFFENSON, J. L., Effects of maternal hyperventilation on uterine blood flow and fetal oxygenation and acid-base status, 340
- Lidocaine, see under Anesthetics, local
- LIPPMANN, M., and FIELDS, W. A., Burns of the skin caused by a peripheral-nerve stimulator (clinical workshop), 82
- Literature Briefs (abstracts), 109, 318, 419, 522, 616
- LITTLE, DAVID M., JR., Anesthesiologists in intensive care (correspondence), 614
- Local anesthetics, see Anesthetics, local
- LOCKHART, C. H., and NELSON, W. L., The relationship of ketamine requirement to age in pediatric patients (clinical workshop), 507
- LOEHNING, R. W., and MAZZE, R. I., Possible nephrotoxicity from enflurane in a patient with severe renal disease (clinical workshop), 203
- LONGNECKER, D. E., see STOELTING, R. K., *jt. auth.*
- Lung  
acid-aspiration pneumonitis treated with steroids, evaluation [Dudley & Marshall], 136  
aspiration  
pneumonitis treated with steroids, evaluation [Downs & others], 129  
during vaginal delivery (correspondence) [Roherts & Shirley], 317  
dead-space-to-tidal volume ratio, equation and nomograms (laboratory note) [Torda & Duncalf], 593  
pulmonary arterial blood, errors in sampling with Swan-Ganz catheter (clinical workshop) [Shapiro & others], 291  
pulmonary-artery occlusion, unilateral, effect on rate of increase of arterial anesthetic concentration [Stoelting & Longnecker], 563  
tidal volume, deadspace and, ratio, equation and nomograms (laboratory note) [Torda & Duncalf], 593
- MAC, see under Potency, anesthetic
- MACDONNELL, K. F., see JOHNSTON, R. P., *jt. auth.*
- Macroglossia, see under Complications
- MAEKAWA, T., see SAKABE, T., *jt. auth.*
- Malignant pyrexia, see Hyperthermia
- Malpractice, see under Medicolegal
- MANFREDI, F., see FARBER, M. O., *jt. auth.*
- MANI, M., see SALEM, M. R., *jt. auth.*
- MANNIELLO, R. L., see BRACKBILL, Y., *jt. auth.*
- MARSHALL, B. E., see DUDLEY, W. R., *jt. auth.*
- , see HARP, J. R., *jt. auth.*
- MARUSCHAK, G., see WAHRENBRÖCK, E. A., *jt. auth.*
- MARX, G. F., see ECKSTEIN, K.-E., *jt. auth.*
- , see GALBERT, M. W., *jt. auth.*
- MATHEU, A., DIPADUA, D., MILLS, J., and KAHAN, B., Experimental immunity to a metabolite of halothane and fluroxene: cutaneous delayed-type hypersensitivity, 385
- MAZZE, R. I., COUSINS, M. J., and BARR, G. A., Renal effects and metabolism of isoflurane in man, 536
- , see HITT, B. A., *jt. auth.*
- , see LOEHNING, R. W., *jt. auth.*
- MCALLISTER, R. G., Macroglossia—a positional complication (clinical workshop), 199
- MCCLURE, P. D., and IZSAK, J., The use of epsilon-aminocaproic acid to reduce bleeding during cardiac bypass in children with congenital heart disease (clinical workshop), 604
- Measurement techniques  
acid-base equilibrium, using a programmable calculator (clinical workshop) [Gershwin & others], 89  
blood-gas tensions, venous (clinical workshop) [France & others], 311  
cannulation, vena cava (clinical workshop) [Tsueda & others], 304  
catheter, Swan-Ganz, errors in sampling pulmonary arterial blood (clinical workshop) [Shapiro & others], 291  
electromyography  
in assessment of peripheral nerve motor blockade [Poppers & others], 13  
ketamine and neuroleptanalgesia effects in man [Kano & Shimoi], 241  
electrospinogram, ketamine and neuroleptanalgesia effects in man [Kano & Shimoi], 241

Downloaded from <http://ajph.gapub.org/> by user on 20 April 2024

- gas chromatography, analysis of helium in nitrous oxide (laboratory note) [Hickey & others], 73
- neuromuscular blockade, transducer for recording thumb adduction (clinical workshop) [Sokoll], 80
- pain, sensory decision theory (special article) [Clark], 272
- pulse monitor for determining sympathetic block of arm (clinical workshop) [Beene & Eggers], 412
- spirometry, CO<sub>2</sub> absorber placement affects gas exchange and pulmonary function values (correspondence) [Johnstone & others], 609
- Measurements  
blood pressure  
in anesthesia, interpretation [Cullen], 6  
interpretation (editorial views) [Prys-Roberts], 1
- Medicolegal  
death, criteria for determination of (medical intelligence) [Harp], 391  
malpractice (correspondence) [Dillon], 99
- Membranes, permeability to water of inactivated toad bladder, anesthetic effects on [Amarnath & Andersen], 168
- Meperidine, see under Analgesics, narcotic
- Mephentermine, see under Sympathetic nervous system, sympathomimetic agents
- Metabolism  
adenosine monophosphate  
in rat aorta, cyclopropane effects on [Sprague & Ngai], 336  
in rat aorta, halothane and isoflurane effects on [Sprague & others], 162  
atrial muscle, isolated human, morphine effect on [Krishna & Paradise], 147  
cerebral  
enflurane effects on and modification during induced seizures in dog [Michenfelder & Cucchiara], 575  
isoflurane effects on in dog [Cucchiara & others], 571  
lidocaine effects on related to electroencephalogram [Sakabe & others], 433  
drug, see Biotransformation; Pharmacokinetics  
enzyme induction, hepatic microsomal, by inhalation anesthetics [Brown & Sagalyn], 152  
halothane inhibition of glucose-stimulated insulin secretion in isolated pieces of rat pancreas [Gingerich & others], 449  
hemorrhage, inhalation anesthetic effects on response to hypotension induced by [Theye & others], 32  
mitochondrial, depression not a predictor of *in-vivo* anesthetic activity [Nahrwold & others], 566  
pentose phosphate pathway, diethyl ether effect on [Hakim & Moss], 261  
phosphodiesterase  
in rat aorta, cyclopropane effects on [Sprague & Ngai], 336  
in rat aorta, halothane and isoflurane effects on [Sprague & others], 162
- Metabolites, drugs, see under Biotransformation
- Metaraminol, see under Sympathetic nervous system, sympathomimetic agents
- Methemoglobin, see Blood, methemoglobinemia
- Methoxamine, see under Sympathetic nervous system, sympathomimetic agents
- Methoxyflurane, see under Anesthetics, volatile
- Methylmethacrylate bone cement, see under Surgery, orthopedic
- MEYER, M. B., see POPPERS, P. J., jt. auth.
- MICHENFELDER, J. D., and CUCCHIARA, R. F., Canine cerebral oxygen consumption during enflurane anesthesia and its modification during induced seizures, 575  
—, see CUCCHIARA, R. F., jt. auth.
- MILLER, R. D., see FOGDALL, R. P., jt. auth.
- , see MUNGER, W. L., jt. auth.
- MILLMAN, B. S., Investigating acupuncture (correspondence), 611
- MILLS, J., see MATHEU, A., jt. auth.
- Mitochondria, see under Membranes; Metabolism
- MODELL, J. H., CALDERWOOD, H. W., RUIZ, B. C., DOWNS, J. B., and CHAPMAN, R., JR., Effects of ventilatory patterns on arterial oxygenation after near-drowning in sea water, 376  
—, see DOWNS, J. B., jt. auth.
- Morphine, see under Analgesics, narcotic
- MORSE, N., and SMITH, P. C., Ketamine anesthesia in a hydranencephalic infant (clinical workshop), 407
- MOSS, G., see HAKIM, A. M., jt. auth.
- MOSTELLO, L. A., see COWGILL, D. B., jt. auth.
- Motion pictures, use in psychologic preparation of children for induction of anesthesia (special article) [Vernon & Bailey], 68
- MULL, T. D., and SMITH, T. C., Comparison of the ventilatory effects of two antiemetics, benzquinamide and prochlorperazine, 581
- MUNGER, W. L., MILLER, R. D., and STEVENS, W. C., The dependence of *d*-tubocurarine-induced hypotension on alveolar concentration of halothane, dose of *d*-tubocurarine, and nitrous oxide, 442
- MURRAY, J. A., see SHAPIRO, H. M., jt. auth.
- Muscle  
skeletal  
atrophy, succinylcholine effect on [Gronert & Theye], 268  
electromyography in assessment of peripheral nerve motor blockade [Poppers & others], 13  
electromyography, ketamine and neuroleptanalgesia effects [Kano & Shimoji], 241  
oxygen consumption, succinylcholine effects on in normal and atrophic muscle [Gronert & Theye], 268  
potassium flux, succinylcholine effects on in normal and atrophic muscle [Gronert & Theye], 268  
smooth: see under Arteries; Lungs, bronchi; Veins
- NAHRWOLD, M. L., CLARK, C. R., and COHEN, P. J., Is depression of mitochondrial respiration a predictor of *in-vivo* anesthetic activity?, 566

- NAKASHIMA, H., see SHIMOJI, K., jt. auth.  
Naloxone, see under Antagonists, narcotic  
NELSON, K. G., see BRITTON, R. M., jt. auth.  
NELSON, W. L., see LOCKHART, C. H., jt. auth.  
Nephrotoxicity, see under Kidney  
Nerve  
See also under sympathetic nervous system  
ketamine effects on evoked electrospinogram and electromyogram in man [Kano & Shimoji], 241  
neuroleptics, effects on evoked electrospinogram and electromyogram in man [Kano & Shimoji], 241  
sympathetic blockade, lidocaine concentrations producing in B- and C- fibers [Heavner & de Jong], 228  
thiamylal effects on somatosensory evoked responses in man [Shimoji & others], 234  
transmission, dorsal-horn unit activity, lamina-specific suppression and acceleration by nitrous oxide [Taub & others], 24  
Neuroleptics, see under Anesthetics, intravenous  
Neuromuscular block, see under Anesthetic techniques, regional  
Neuromuscular blockers, see Neuromuscular relaxants  
Neuromuscular relaxants  
gallamine, ganglionic muscarinic activity enhanced by (laboratory note) [Gardier & others], 494  
measurement of response with transducer for recording thumb adduction (clinical workshop) [Sokol], 80  
pancuronium  
blockade prolonged by Polymyxin B (clinical workshop) [Fogdall & Miller], 84  
laryngoscopy and endotracheal intubation with during light general anesthesia, cardiovascular responses to (clinical workshop) [Vaughan & others], 75  
morphine and, hemodynamic interaction between (clinical workshop) [Grossman & Jacob], 299  
prolonged neuromuscular blockade with in healthy patient (clinical workshop) [Belafsky & Klawans], 295  
succinylcholine  
effect on skeletal muscle with immobilization atrophy [Gronert & Theye], 268  
encephalitis and hyperkalemic response to (clinical workshop) [Cowgill & others], 409  
*d*-tubocurarine  
effects on intracranial pressure and thalamic electrical impedance [Tarkanen & others], 247  
hypotension induced by, dependence on alveolar halothane, dose of *d*-tubocurarine, and nitrous oxide [Munger & others], 442  
Newborn, see Anesthesia, obstetric; Anesthesia, pediatric  
NGAI, S. H., STINCHFIELD, F. E., and TRINER, L., Air embolism during total hip arthroplasties (clinical workshop), 405  
—, see SPRAGUE, D. H., jt. auth. (2)  
Nitrous oxide, see under Anesthetics, gases  
Obituary, Robert Dunning Dripps [Wollman], 114  
Obstetrics  
see also Anesthesia, obstetric  
aortocaval compression and uterine displacement (clinical workshop) [Eckstein & Marx], 92  
OLIVER, P. B., see TSUEDA, K., jt. auth.  
Organizations  
International Symposium on Cerebral Circulation and Metabolism (report of scientific meeting) [Shapiro & Wollman], 208  
International Symposium on Oxygen Transport to Tissue (report of scientific meeting) [Shapiro], 103  
Royal Australasian College of Surgeons and Faculty of Anaesthetists (report of scientific meeting) [Cousins], 417  
Output, cardiac, see Heart, output  
Oxalate, see Biotransformation, methoxyflurane  
Oxygen  
consumption  
skeletal muscle, normal and atrophic, succinylcholine effects on [Gronert & Theye], 268  
volatile anesthetic and cyclopropane effects on in dogs [Perry & others], 465  
saturation  
fetal, effects of maternal bicarbonate administration to pregnant ewe [Ralston & others], 348  
fetal, effects of maternal hyperventilation of pregnant ewe [Levinson & others], 340  
second-gas effect of nitrous oxide on, extent and duration (clinical workshop) [Bojrab & Stoelting], 201  
transport  
during acute alkalosis and hyperphosphatemia in dogs [Farber & others], 525  
tissue oxygen requirements and, relationship (editorial views) [Laver], 523  
to tissue, symposium on (report of scientific meeting) [Shapiro], 103  
Oxymorphone, see under Analgesics, narcotic  
Oxytocin, see under Uterus  
Pain, measurement, sensory decision theory (special article) [Clark], 272  
Pancuronium, see under Neuromuscular relaxants  
PARADISE, R. R., see GINGERICH, R., jt. auth.  
—, see KRISHNA, G., jt. auth.  
Paralysis, prolonged, see under Complications  
PASSO, T. C., see FARBER, M. O., jt. auth.  
PEAK, J., see WELS, F. R., JR., jt. auth.  
Pediatric anesthesia, see under Anesthesia  
PEEP, see Ventilation, positive end-expiratory pressure  
Pemphigus, see under Complications  
Pentobarbital, see under Hypnotics, barbiturate  
Pentose phosphate pathway, see under Metabolism  
People's Republic of China, anesthesiology in, see under Anesthesiology

- Peridural anesthesia, see Anesthetic techniques, peridural
- PERKINS, H. M., see DOWNS, J. B., jt. auth.
- Permeability, membrane, see under Membranes
- PERRY, L. B., VAN DYKE, R. A., and THEYE, R. A., Sympathoadrenal and hemodynamic effects of isoflurane, halothane, and cyclopropane in dogs, 465
- , see THEYE, R. A., jt. auth.
- PETERSON, C., see STOELTING, R. K., jt. auth.
- PETTY, C., and CUNNINGHAM, N. L., Insulin adsorption by glass infusion bottles, polyvinylchloride infusion containers, and intravenous tubing (clinical workshop), 400
- PFAEFFLE, H. H., see BERKEBILE, P. E., jt. auth.
- pH, see Acid-base equilibrium; Carbon dioxide, hypercarbia; Carbon dioxide, hypocarbia; Hydrogen
- Phagocytosis, see under Blood, leukocytes
- Pharmacokinetics
- pentobarbital [Saubermann & others], 41
- second-gas effect
- in gas chromatographic analysis of helium in nitrous oxide [laboratory note] [Hickey & others], 73
- of nitrous oxide on oxygen, extent and duration (clinical workshop) [Bojrab & Stoelting], 201
- uptake
- anesthetic, body size effect on in rat, man, and whale [Wahrenbrock & others], 19
- cyclopropane, halothane, and methoxyflurane, effect of unilateral pulmonary-artery occlusion [Stoelting & Longnecker], 563
- Pharmacology, fluorocarbons, Caroxin-D and Caroxin-F, lack of effect on mitochondrial respiration [Nahrwold & others], 566
- Phenothiazines, see Ataractic agents
- Phentolamine, see under Sympathetic nervous system, sympatholytic agents
- Phenylephrine, see under Sympathetic nervous system, sympathomimetic agents
- Phosphodiesterase, see Metabolism, phosphodiesterase
- Physiotherapy, see Lung, physical therapy
- Pin indexing, see under Equipment
- Pneumonitis, see under Complications; Lung
- Polymyxin B, see under Antibiotics
- PONTOFFIDAN, H., see KUMAR, A., jt. auth.
- POPPERS, P. J., KATZ, R. L., ERICSON, E. V., MEYER, M. B., and COVINO, B. G., Evaluation of etidocaine, a new local anesthetic agent, with a modified bilateral ulnar-nerve-block technique, 13
- Position, body
- sitting, complicated by macroglossia (clinical workshop) [McAllister], 199
- supine-hypotension syndrome in pregnant women near term (clinical workshop) [Eckstein & Marx], 92
- Positive end-expiratory pressure, see Ventilation, positive end-expiratory pressure
- Potassium, see under Ions
- Potency, anesthetic
- depression of mitochondrial respiration not a predictor of *in-vivo* anesthetic activity [Nahrwold & others], 566
- halothane, determination of anesthetic requirement in rat [White & others], 52
- isoflurane, determination of anesthetic requirement in rat [White & others], 52
- ketamine requirement relationship to age in pediatric patients (clinical workshop) [Lockhart & Nelson], 507
- Pressure, blood, see under Blood pressure
- PRIBBLE, A. H., see SHAPIRO, H. M., jt. auth.
- Prochlorperazine, see under Ataractic agents; Vomiting, antiemetics
- Programmable calculator, see under Equipment, calculator
- Prostaglandins, see under Hormones
- PRYS-ROBERTS, C., Arterial manometry under pressure? (editorial views), 1
- Psychologic function, trace anesthetic effects on perceptual, cognitive and motor skills [Bruce & others], 453
- Psychologic responses
- newborns
- after maternal epidural anesthesia, assessment [Scanlon & others], 121
- after meperidine, assessment [Brackbill & others], 116
- pediatric patients, motion picture effects in preparation for induction of anesthesia (special article) [Vernon & Bailey], 68
- Pulmonary, see under Lung
- Pulse monitor, see under Equipment
- Pulse pressure, see under Blood pressure
- Pulsus alternans, see under Complications, arrhythmia; Heart, arrhythmia
- Pyrexia, see Hyperthermia
- RALSTON, D. H., SHNIDER, S. M., and DELORMIER, A. A., Effects of equipotent ephedrine, metaraminol, mephentermine, and methoxamine on uterine blood flow in the pregnant ewe, 354
- , SHNIDER, S. M., and DELORMIER, A. A., Uterine blood flow and fetal acid-base changes after bicarbonate administration to the pregnant ewe, 348
- RAVIN, M. B., and THAM, M. K., The goldfish as an anesthesia and resuscitation teaching model (laboratory note), 288
- Receptors
- see also under Sympathetic nervous system, alpha-adrenergic and beta-adrenergic
- presso-, cyclopropane effects on in the cat [Fukunaga & Epstein], 323
- REDDERSON, C. L., UY, D., and ANTON, A. H., New techniques for spinal anesthesia in the dog (laboratory note), 187

- Reflexes, laryngeal closure, effects of intravenous Innovar and topical spray compared (clinical workshop) [Kopriva & others], 596
- Regional anesthesia, see Anesthetic techniques, regional
- REHKOFF, P., see BERKEBILE, P. E., jt. auth.
- REIER, C. E., see JOHNSTONE, R. E., jt. auth.
- Relaxants, see Neuromuscular relaxants
- Renal, see under Kidney
- RENN, W. H., see STILL, J. A., JR., jt. auth.
- Research funding in anesthesiology (editorial views) [Kitz & Biebuyck], 211
- Respiration, see Metabolism, oxygen consumption; Ventilation
- RICHTER, R. W., see TSUEDA, K., jt. auth.
- ROA, N. L., see VAUGHAN, R. W., jt. auth.
- ROBERTS, R. B., and SHIRLEY, M., Aspiration during vaginal delivery (correspondence), 317
- ROMAGNOLI, A., Potencies of fentanyl and morphine (correspondence), 519
- Rotameters, see under Equipment
- Royal Australasian College of Surgeons and Faculty of Anaesthetists, see under Organizations
- RUIZ, B. C., see MODELL, J. H., jt. auth.
- SAGALYN, A. M., see BROWN, B. R., JR., jt. auth.
- SAKABE, T., MAEKAWA, T., ISHIKAWA, T., and TAKESHITA, H., The effects of lidocaine on canine cerebral metabolism and circulation related to the electroencephalogram, 433
- SALEM, M. R., WONG, A. Y., MANI, M., and SELICK, B. A., Efficacy of cricoid pressure in preventing gastric inflation during bag-mask ventilation in pediatric patients (clinical workshop), 96
- SARA, C. A., see SHANKS, C. A., jt. auth.
- SAUBERMANN, A. J., GALLAGHER, M. L., and HEDLEY-WHYTE, J., Uptake, distribution, and anesthetic effect of pentobarbital- $^{14}\text{C}$  after intravenous injection into mice, 41
- SCANLON, J. W., BROWN, W. U., JR., WEISS, J. B., and ALPER, M. H., Neurobehavioral responses of newborn infants after maternal epidural anesthesia, 121
- Second-gas effect, see under Pharmacokinetics
- SELLICK, B. A., see SALEM, M. R., jt. auth.
- Sensory decision theory, see under Measurement, pain; Pain, measurement
- SHANKS, C. A., and SARA, C. A., Estimation of inspiratory-limb humidity in the circle system (correspondence), 99
- SHAPIRO, H. M., Symposium on Oxygen Transport to Tissue (report of scientific meeting), 103
- , SMITH, C., PRUBBLE, A. H., MURRAY, J. A., and CHENEY, F. W., JR., Errors in sampling pulmonary arterial blood with a Swan-Ganz catheter (clinical workshop), 291
- , and WOLLMAN, H., Sixth International Symposium on Cerebral Circulation and Metabolism (report of scientific meeting), 208
- , see COWGILL, D. B., jt. auth.
- SHIMIZU, H., see SHIMOJI, K., jt. auth.
- SHIMOJI, K., KANO, T., NAKASHIMA, H., and SHIMIZU, H., The effects of thiamylal sodium on electrical activities of the central and peripheral nervous systems in man, 234
- , see KANO, T., jt. auth.
- SHIMOSATO, S., see KEMMOTSU, O., jt. auth.
- SHIRLEY, M., see ROBERTS, R. B., jt. auth.
- SHNIDER, S. M., see LEVINSON, G., jt. auth.
- , see RALSTON, D. H., jt. auth. (2)
- Shock, hemorrhagic, inhalation anesthetic effects on response to [Theye & others], 32
- SIEBERT, P. E., see KOPRIVA, C. J., jt. auth.
- Sinusitis, see under Complications
- SLOGOFF, S., see CHENEY, D. H., jt. auth.
- SMITH, G., see SHAPIRO, H. M., jt. auth.
- SMITH, N. T., see GERSHWIN, R., jt. auth.
- , see GREGORY, G. A., jt. auth.
- SMITH, P. C., see MORSE, N., jt. auth.
- SMITH, R. B., see BERKEBILE, P. E., jt. auth.
- SMITH, T. C., see HUDSON, H. E., jt. auth.
- , see JOHNSTONE, R. E., jt. auth.
- , see MULL, T. D., jt. auth.
- Sodium, see Ions, sodium
- SOKOLL, M. D., A new transducer and holder for recording thumb adduction (clinical workshop), 80
- Somatosensory evoked responses, see under Brain, evoked responses
- Spinal anesthesia, see Anesthetic techniques, spinal
- Spinal cord
- dorsal horn unit activity, lamina-specific suppression and acceleration by nitrous oxide [Taub & others], 24
- electrospinogram, ketamine and neuroleptanalgesia effects [Kano & Shimoji], 241
- ketamine effects on evoked electrospinogram in man [Kano & Shimoji], 241
- neuroleptics, effects on evoked electrospinogram in man [Kano & Shimoji], 241
- thiamylal effects on somatosensory evoked responses in man [Shimoji & others], 234
- Spirometry, see under Measurement techniques
- SPRAGUE, D. H., and NGAI, S. H., Effects of cyclopropane on contractility and the cyclic 3',5'-adenosine monophosphate system in the rat aorta, 336
- , YANG, J. C., and NGAI, S. H., Effects of isoflurane and halothane on contractility and the cyclic 3',5'-adenosine monophosphate system in the rat aorta, 162
- STAUFFER, G. L., see DELEO, B. C., jt. auth.
- STEFFENSON, J. L., see LEVINSON, G., jt. auth.
- Sterilization, autoclaving, steam, instability of bupivacaine with epinephrine after (clinical workshop) [DeLeo & others], 297
- Steroids, see Hormones, steroid
- STEVENS, W. C., see MUNGER, W. L., jt. auth.
- STILL, J. A., JR., LEDERMAN, D. S., and RENN, W. H., Pulmonary edema following air em-

- bolism (clinical workshop), 194
- STINGFIELD, F. E., see NGAI, S. H., jt. auth.
- STOELTING, R. K., KIM, K. C., PETERSON, C., and HASELBY, K. A., Investigating acupuncture (correspondence), 613
- , and LONGNECKER, D. E., The effect of unilateral pulmonary-artery occlusion on the rate of increase of arterial anesthetic concentration, 563
- , see BOJRAB, L., jt. auth.
- Stomach, see under Gastrointestinal tract
- Stress ulcers, see under Complications
- Succinylcholine, see under Neuromuscular relaxants
- Supine-hypotension syndrome, see under Blood pressure; Position; Complications
- Surgery  
bronchoscopy  
improper oxygenation during bronchofiberscopy (clinical workshop) [Britton & Nelson], 87  
inflation-catheter technique for ventilation during (clinical workshop) [Gillick], 503  
orthopedic  
hip arthroplasties, total, air embolism during (clinical workshop) [Ngai & others], 405  
molecular structure of bone cement (correspondence) [Klein], 206
- SUSSMAN, D. R., A comparative evaluation of ketamine anesthesia in children and adults, 459
- SUTTON, W. W., see DOWNS, J. B., jt. auth.
- SUWA, K., see GERSHWIN, R., jt. auth.
- Swan-Ganz catheter, see under Equipment, catheter; Measurement techniques, catheter
- Sympathetic nervous system  
alpha-adrenergic receptors, ketamine lack of stimulation in spiral-cut strips of rabbit aorta [Yamanaka & Dowdy], 222  
beta-adrenergic receptors  
halothane and isoflurane effects on contractility and cAMP in rat aorta [Sprague & others], 162  
ketamine lack of stimulation in spiral-cut strips of rabbit aorta [Yamanaka & Dowdy], 222  
blockade, arm, pulse monitor for determining (clinical workshop) [Beene & Eggers], 412  
cyclopropane effects on in the cat [Fukunaga & Epstein], 323  
epinephrine, bupivacaine with, instability of steam-autoclaved (clinical workshop) [DeLeo & others], 297  
ganglionic transmission, gallamine enhancement (laboratory note) [Gardier & others], 494  
lidocaine blocking concentrations for B- and C-nerve fibers [Heavner & de Jong], 228  
sympatholytic agents, phentolamine and ketamine effects on phenylephrine-contracted strips of rabbit aorta compared [Yamanaka & Dowdy], 222
- sympathomimetic agents  
ephedrine, uterine blood flow response to in pregnant ewe [Ralston & others], 354  
isoproterenol and ketamine effects on phenylephrine-contracted strips of rabbit aorta compared [Yamanaka & Dowdy], 222  
mephentermine, uterine blood flow response to in pregnant ewe [Ralston & others], 354  
metaraminol, uterine blood flow response to in pregnant ewe [Ralston & others], 354  
methoxamine, uterine blood flow response to in pregnant ewe [Ralston & others], 354  
phenylephrine contraction of spiral-cut strips of rabbit aorta, ketamine effects on [Yamanaka & Dowdy], 222  
tetanus, cardiovascular effects (medical intelligence) [Tsueda & others], 588  
volatile anesthetic and cyclopropane effects on in dogs [Perry & others], 465
- SZELE, G., Investigating acupuncture (correspondence), 612
- TAKESHITA, H., see SAKABE, T., jt. auth.
- TANTISIRA, B., see WADHWA, R. K., jt. auth.
- TARKKANEN, L., LAITINEN, L., and JOHANSSON, G., Effects of *d*-tubocurarine on intracranial pressure and thalamic electrical impedance, 247
- TAUB, A., HOFFERT, M., and KITAHATA, L. M., Lamina-specific suppression and acceleration of dorsal-horn unit activity by nitrous oxide: a statistical analysis, 24
- Teaching, see Education
- Tears, see under Eyes
- Tetanus, see under Infection
- Thalamus, see under Brain
- THAM, M. K., see RAVIN, M. B., jt. auth.
- Theories of anesthesia, mitochondrial respiration, depression of not a predictor of *in-vivo* anesthetic activity [Nahrwold & others], 566
- Theory, sensory decision, see under Measurement, pain; Pain, measurement
- THEYE, R. A., PERRY, L. B., and BRZICA, S. M., JR., Influence of anesthetic agent on response to hemorrhagic hypotension, 32
- , see CUCCHIARA, R. F., jt. auth.
- , see GRONERT, G. A., jt. auth.
- , see PERRY, L. B., jt. auth.
- Thiamylal, see under Anesthetics, intravenous
- Thyroid cartilage, see under Larynx
- TORDA, T. A., and DUNCALF, D., Physiologic deadspace-to-tidal volume ratio: a new working equation and nomograms (laboratory note), 593
- , see JEYARAM, C., jt. auth.
- Toxicity  
potential, inhalation anesthetics compared with other anesthetic techniques (editorial views) [Cascorbi & Gravenstein], 319  
renal, from enflurane, possible, in patient with severe renal disease (clinical workshop) [Loehning & Mazze], 203
- Trace anesthetics, see under Anesthetics, gases; Anesthetics, volatile
- Tracheal connectors, see Equipment, endotracheal connectors
- Training, see Education
- Transducer, see under Equipment
- Transfusion, microaggregate formation in stored blood, factors determining (clinical workshop) [Harp & others], 398



- Transmission, see under Nerve
- Trifluoroacetate, see under Biotransformation, fluoroene; Biotransformation, halothane
- TRINER, L., see NGAL, S. H., jt. auth.
- TRUDELL, J. R., see HITT, B. A. jt. auth.
- TSUEDA, K., JEAN-FRANCOIS, J. L., and GONZALEZ, E. C., Cannulation of the superior vena cava—a new approach (clinical workshop), 304
- , OLIVER, P. B., and RICHTER, R. W., Cardiovascular manifestations of tetanus (medical intelligence), 588
- d*-Tubocurarine, see under Neuromuscular relaxants
- Ulcers, see under Gastrointestinal tract, stomach
- Ulnar nerve block, see under Anesthetic techniques, regional
- Unit activity, see under Spinal cord, dorsal horn
- Uptake, see Pharmacokinetics, uptake
- URBAN, B. J., and WEITZNER, S. W., The Amsterdam infant ventilator and the Ayre T-piece in mechanical ventilation, 423
- Urine, see Kidney, urine
- Uterus
- blood flow
- alkalosis, metabolic, effect on in pregnant ewe [Ralston & others], 348
- alkalosis, respiratory, effect on in pregnant ewe [Levinson & others], 340
- blood pressure responses to sympathomimetic agents in pregnant ewe [Ralston & others], 354
- sympathomimetic agent effects on in pregnant ewe [Ralston & others], 354
- displacement, lateral, in pregnant women near term (clinical workshop) [Eckstein & Marx], 92
- oxytocin effects on blood pressure during anesthesia (clinical workshop) [Weis & Peak], 189
- UY, D., see REDDERSON, C. L., jt. auth.
- VAN DYKE, R. A., see PERRY, L. B., jt. auth.
- VAUGHAN, R. W., COBB, M. L., and ROA, N. L., Cardiovascular responses to laryngoscopy and endotracheal intubation with pancuronium during light general anesthesia (clinical workshop), 75
- Veins
- blood-gas tensions, determination during general anesthesia (clinical workshop) [France & others], 311
- jugular, cannulation complicated by puncture of endotracheal tube cuff (clinical workshop) [Blitt & Wright], 306
- vena cava, cannulation (clinical workshop) [Tsueda & others], 304
- Vena cava, see under Anatomy; Veins
- Ventilation
- alkalosis and opioid interaction in man causing depression of [Hudson & others], 543
- assisted, PEEP during (clinical workshop) [Johnston & others], 308
- dead-space-to-tidal volume ratio, equation and nomograms (laboratory note) [Torda & Duncalf], 593
- drowning, near-, ventilatory pattern effects on arterial oxygenation after [Modell & others], 376
- intermittent positive-pressure, aspiration of sea water treated by [Modell & others], 376
- mechanical
- acute respiratory failure, inappropriate response to increased plasma ADH during [Kumar & others], 215
- pediatric, Amsterdam infant ventilator and Ayre T-piece in [Urban & Weitzner], 423
- PEEP during (clinical workshop) [Johnston & others], 308
- uterine blood flow response to hyperventilation in pregnant ewe [Levinson & others], 340
- weaning after five years of (clinical workshop) [Downs & others], 602
- oxymorphone and alkalosis interaction in man causing depression of [Hudson & others], 543
- positive end-expiratory pressure
- acute respiratory failure, inappropriate response to increased plasma ADH during [Kumar & others], 215
- aspiration of sea water treated by [Modell & others], 376
- during assisted ventilation (clinical workshop) [Johnston & others], 308
- tidal volume, deadspace and, ratio, equation and nomograms (laboratory note) [Torda & Duncalf], 593
- VERNON, D. T. A., and BAILEY, W. C., The use of motion pictures in the psychological preparation of children for induction of anesthesia (special article), 68
- Veterinary anesthesia, see under Anesthesia
- VIRTUE, R. W., Minimal-flow nitrous oxide anesthesia (clinical workshop), 196
- Volatile anesthetics, see Anesthetics, volatile
- Volume, closing, see Lung, closing volume
- Vomiting
- antiemetics
- benzquinamide, prochlorperazine and, ventilatory effects compared [Mull & Smith], 581
- prochlorperazine, benzquinamide and, ventilatory effects compared [Mull & Smith], 581
- WADHWA, R. K., and TANTISIRA, B., Parotidectomy in a patient with a family history of hyperthermia (clinical workshop), 191
- WAHRENBROCK, E. A., EGER, E. I., II, LARAVUSO, R. B., and MARUSCHAK, G., Anesthetic uptake—of mice and men (and whales), 19
- Water, see also Fluid balance; Membrane permeability
- Weaning, see under Ventilation, mechanical
- WEBRE, D. R., see ARENS, J. F., jt. auth.
- WEEKS, D. B., A new use for an old blade (clinical workshop), 200
- , Evaluation of a disposable humidifier (clinical workshop), 511

- WEIS, F. R., JR., and PEAK, J., Effects of oxytocin on blood pressure during anesthesia (clinical workshop), 189
- WEISS, J. B., see SCANLON, J. W., jt. auth.
- WEITZNER, S. W., see URBAN, B. J., jt. auth.
- WELSH, B. E., A non-endotracheal airway for surgery of the head in outpatients (clinical workshop), 298
- Whales, see under Anesthesia, veterinary
- WHITE, P. F., JOHNSTON, R. R., and EGER, E. I., II, Determination of anesthetic requirement in rats, 52
- WINTER, P. M., Anesthesiologists in intensive care (correspondence), 613
- WOLLMAN, H., Effects of prostaglandins on editorial policy (editorial views), 421
- , Obituary, Robert Dunning Dripps, 114
- , see SHAPIRO, H. M., jt. auth.
- WONG, A. Y., see SALEM, M. R., jt. auth.
- WRIGHT, P. H., see GINGERICH, R., jt. auth.
- WRIGHT, W. A., see BLITT, C. D., jt. auth.
- WURZEL, H. A., see HARP, J. R., jt. auth.
- WYCHE, M. Q., see HARP, J. R., jt. auth.
- YAMANAKA, I., and DOWDY, E. G., The effect of ketamine on spiral-cut strips of rabbit aorta, 222
- YANG, J. C., see SPRAGUE, D. H., jt. auth.
- YOSHIMURA, N., see GION, H., jt. auth.
